# Supplementary material for: IP3 receptor orchestrates maladaptive vascular responses in heart failure
Source: PubMed Central journal article supplement (PMC8843748; doi:10.1172/jci152859), 2022-02-15
Supplement: jci-132-152859-s055.pdf [file jci-132-152859-s055.pdf]

## Supplementary data

### IP3 Receptor Orchestrates Maladaptive Vascular Responses in Heart Failure

Dridi H, Santulli G, et al.

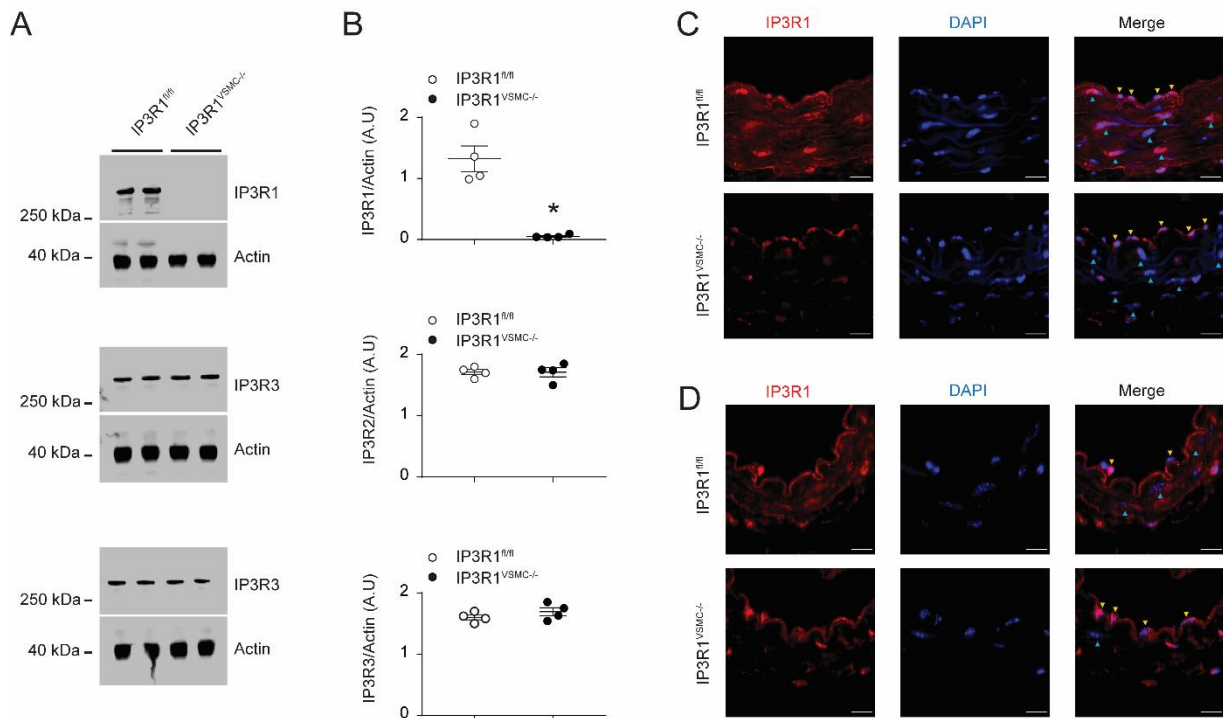

**Figure S1. Generation and characterization of IP3R1<sup>VSMC<sup>-/-</sup></sup> mice.**

**A)** Representative immunoblot assessing the expression of IP3R1, IP3R2 and IP3R3 isoforms in denuded aortic segments from IP3R1<sup>fl/fl</sup> and IP3R1<sup>VSMC<sup>-/-</sup></sup> mice. **B)** Quantification of immunoblots showed in panel **A**. Representative immunofluorescence images of aorta (**C**) and mesenteric arteries (**D**) from IP3R1<sup>fl/fl</sup> and IP3R1<sup>VSMC<sup>-/-</sup></sup> mice stained for IP3R1 (red). Nuclei were counterstained with DAPI (blue); original magnification, 63x; scale bars, 10  $\mu$ m; EC: endothelial cells (yellow arrows); VSMC: vascular smooth muscle cells (Cyan arrows). Individual data are shown with mean  $\pm$  s.e.m. of three independent experiments; A.U.: arbitrary units. \*:  $p < 0.01$  vs IP3R1<sup>fl/fl</sup>; two-tailed Student's *t* test.

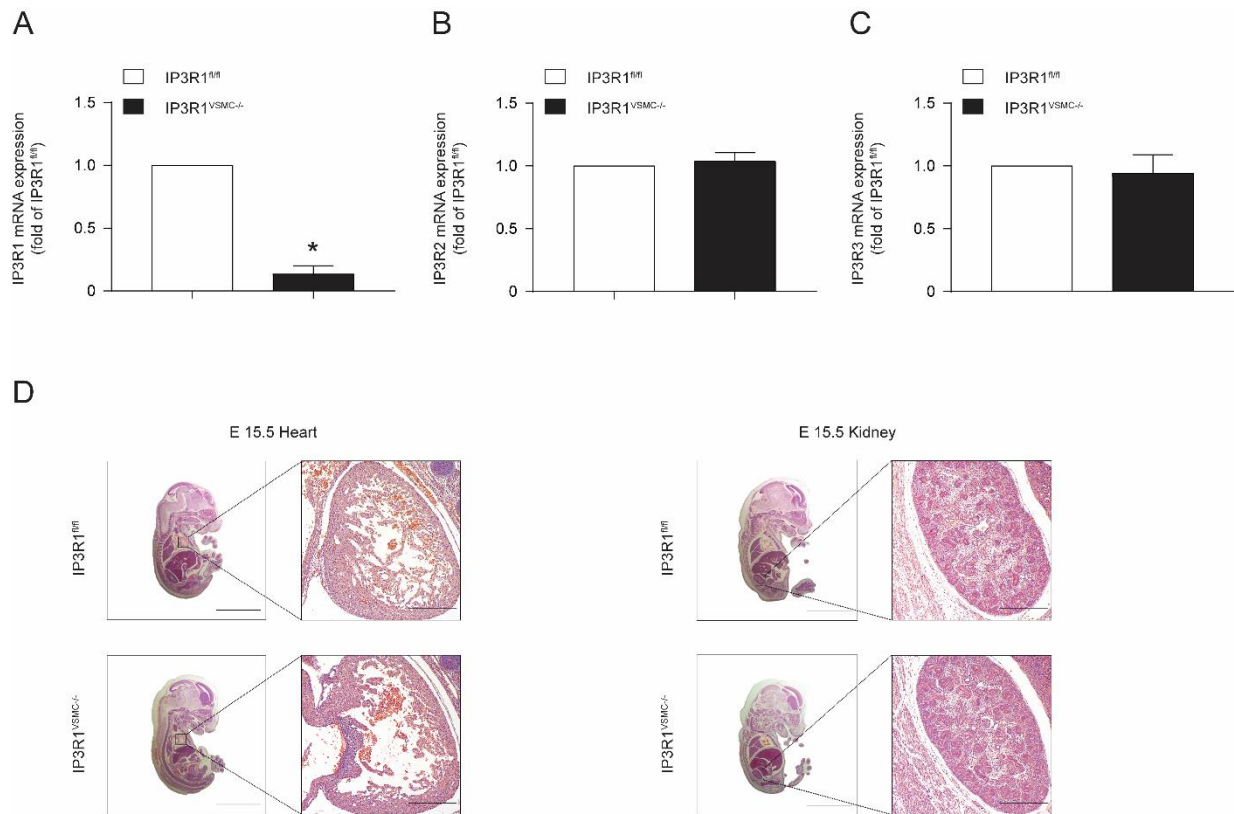

**Figure S2. No upregulation of IP3R2 IP3R3 isoforms or abnormal organs development in IP3R1 deficient VSMC.** IP3R1, IP3R2 and IP3R3 mRNA levels quantified by real-time RT-qPCR analysis of total RNA from isolated VSMC, using actin as internal standard; each bar represents mean  $\pm$  s.e.m. of four independent experiments in each of which reactions were performed in triplicate using the pooled total RNAs from five mice/group; \*:  $p < 0.01$  vs IP3R1<sup>fl/fl</sup>; two-tailed Student's *t* test. **D**) Normal organ development in IP3R1<sup>VSMC-/-</sup> mice. Representative pictures of heart and kidney at embryonic day 15.5 are shown; no developmental abnormalities were observed in any of the major organs. Dimensional bar: 4 mm (in each inset: 200  $\mu$ m).

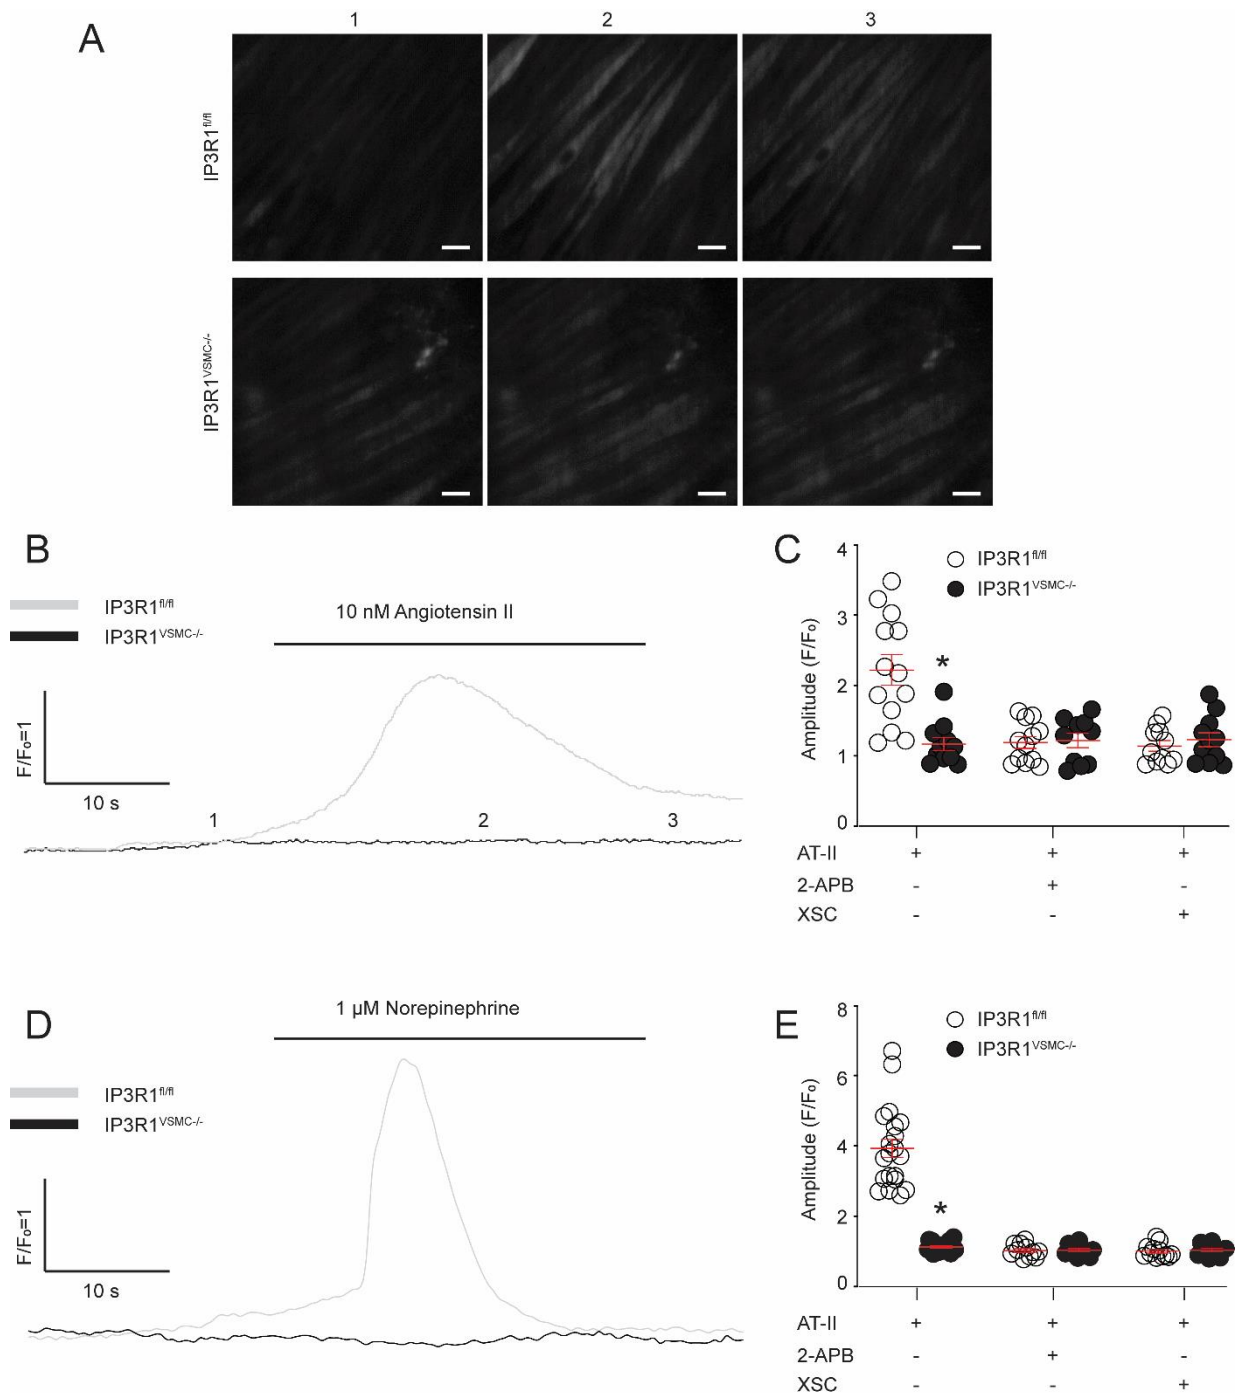

**Figure S3. Effects of IP3R1 deletion on Ca<sup>2+</sup> responses in VSMC.**

**A)** Representative images of VSMC Ca<sup>2+</sup> response to ATII (pictures labeled as 1, 2, and 3 correspond to the representative Ca<sup>2+</sup> traces shown in panel **B**, measured with fluorescent Ca<sup>2+</sup> indicator Fluo-4; F/F<sub>0</sub> is quantified in panel **C**, showing also the effects of 2-aminoethoxydiphenyl borate (2-APB) and xestospongine C (XSC). **D)** Representative traces of VSMC Ca<sup>2+</sup> responses to NE, quantified in panel **E**. Data are presented as individual values with means ± SEM. n = at least 30 cells from 6 different mice per group, \**p* < 0.05 vs IP3R1<sup>fl/fl</sup>. two-tailed Student's *t* test. scale bars, 10 μm.

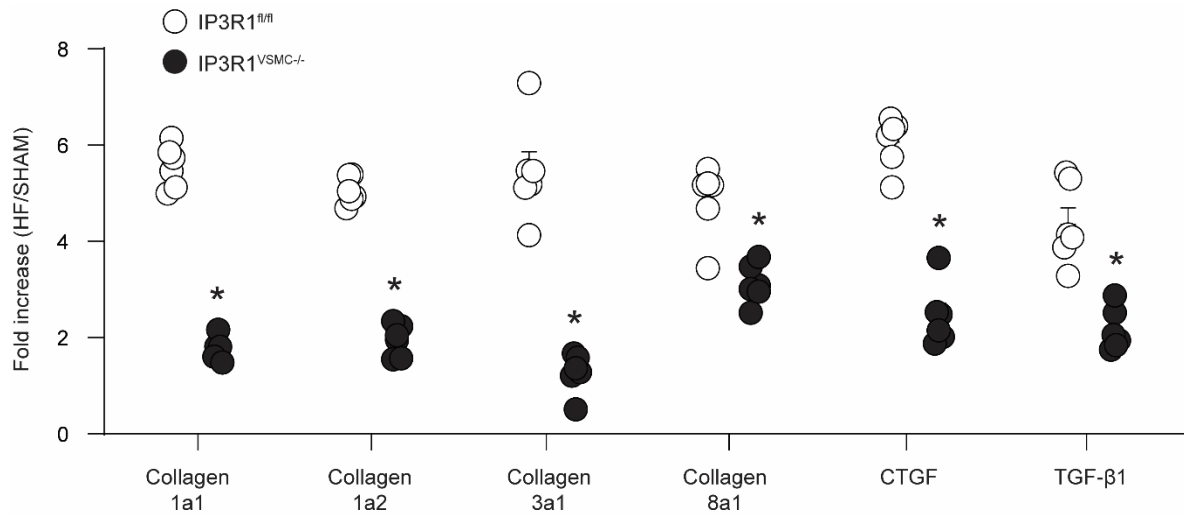

**Figure S4. Reduced mRNA levels of collagens, connective tissue growth factor (CTGF), and transforming growth factor  $\beta$ 1 (TGF- $\beta$ 1) assessed using real-time RT-qPCR analysis of total RNA from cardiac tissue, using actin as internal standard; Individual values are shown with mean  $\pm$  s.e.m. of four independent experiments in each of which reactions were performed in triplicate using the pooled total RNAs from at least five mice/group; \*:p<0.05 vs IP3R1<sup>fl/fl</sup>. two-tailed Student's *t* test.**

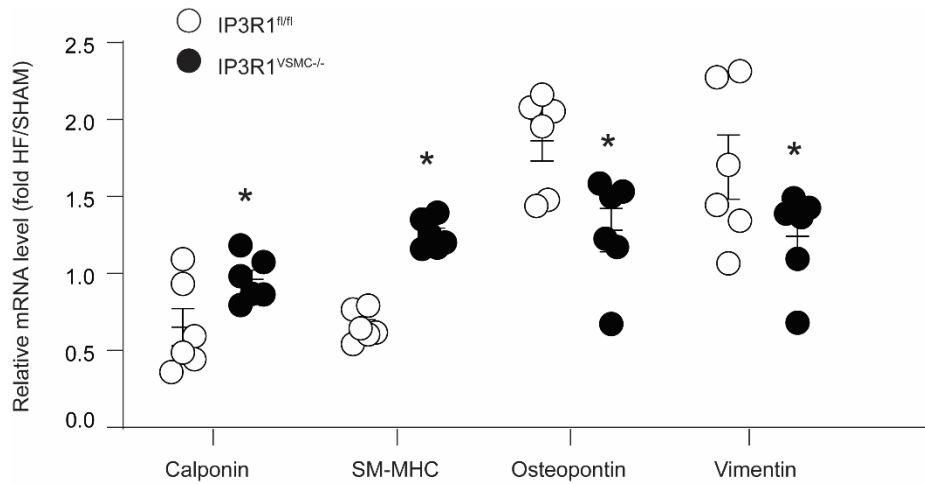

**Figure S5. Upregulation of the quiescent (calponin, SM-MHC) and down regulation of the proliferative state (osteopontin, vimentin).** calponin, SM-MHC, osteopontin and vimentin, in HF and SHAM conditions assessed using real-time RT-qPCR analysis of total RNA, using actin as internal standard; Individual values are shown with mean  $\pm$  s.e.m. of four independent experiments in each of which reactions were performed in triplicate using the pooled total RNAs from at least five mice/group; \*:p<0.05 vs IP3R1<sup>fl/fl</sup>. two-tailed Student's *t* test.

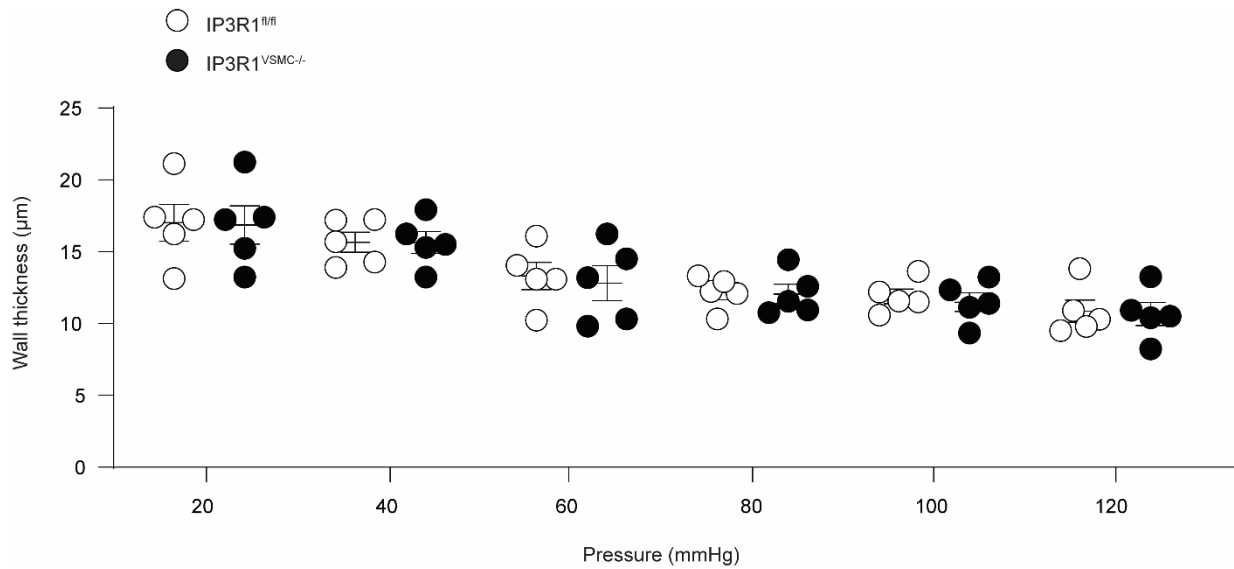

**Figure S6:** Measurement of wall thickness in the myography assays shown in Figure 4. The difference in the myogenic contractile response between IP3R<sup>fl/fl</sup> and IP3R<sup>VSMC-/-</sup> mesenteric arteries (shown in Figure 4), cannot be attributed to modifications in wall thickness;  $n > 5/\text{group}$ . Individual values are shown with mean  $\pm$  s.e.m. two-tailed Student's *t* test

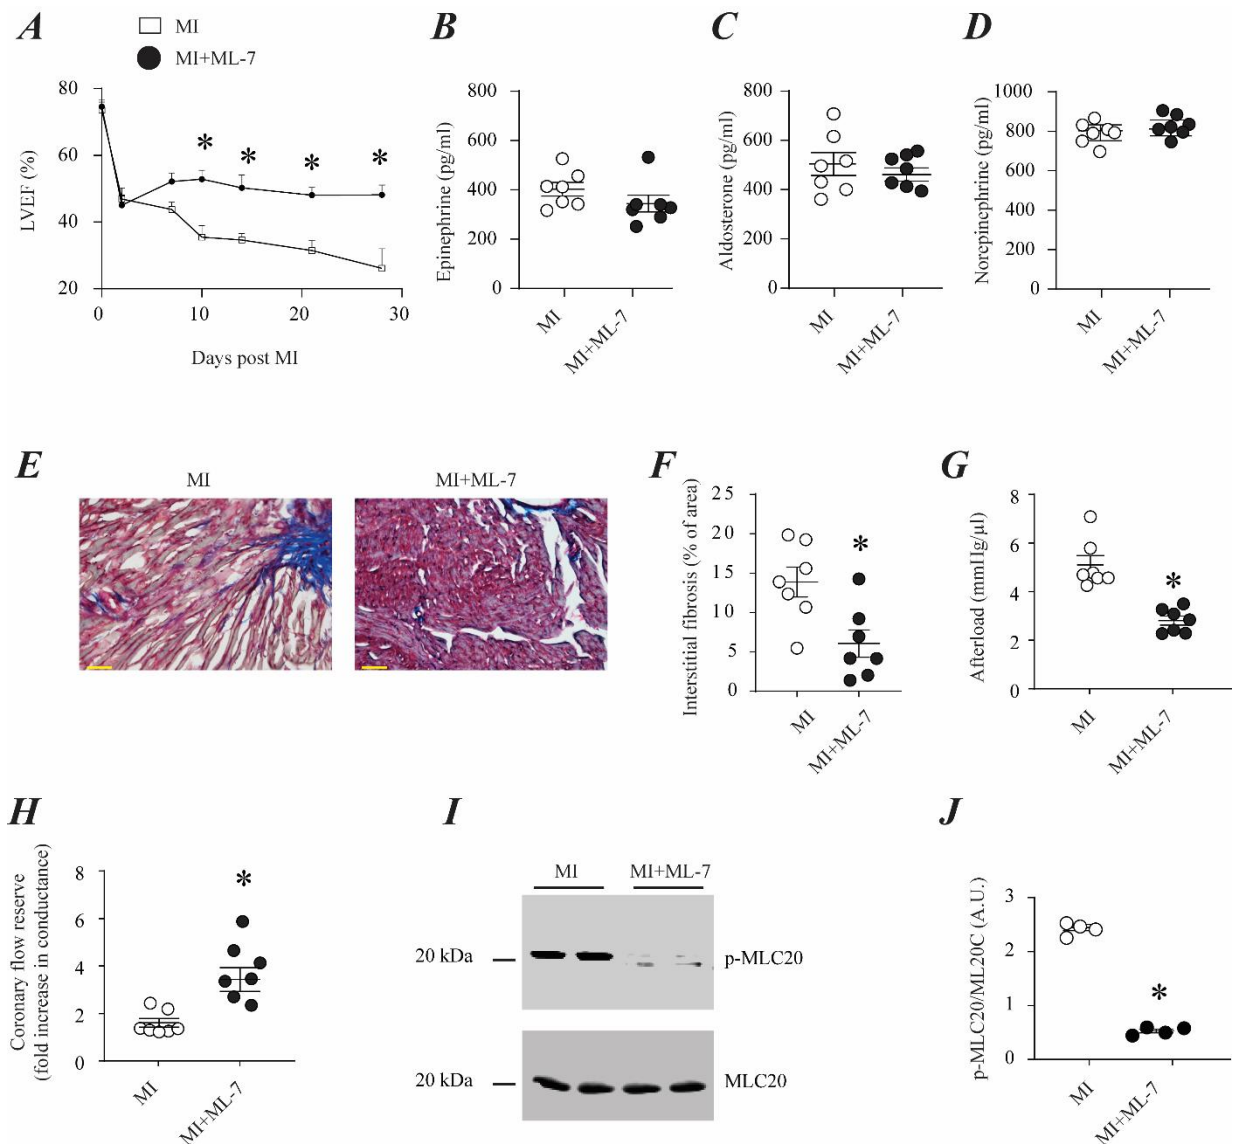

**Figure S7: MLCK inhibitor (ML-7) reduces HF progression.** **A**) HF mice treated with MLCK inhibitor ML-7 exhibit improved left ventricular ejection fraction (LVEF, evaluated by serial echocardiography). **B-D**) ML-7 has no effect on neurohormonal activation in HF assessed by measuring blood level of catecholamines and aldosterone; **E-F**) representative images and bar graph showing reduced interstitial cardiac fibrosis (Masson's trichrome staining, scale bar: 50 $\mu$ m) in MI mice treated with ML-7. **F; G**) Reduced cardiac afterload in ML-7 treated MI mice (ratio of end-systolic pressure and stroke volume); **H**) Improved coronary flow reserve determined in ML-7 treated MI mice; **I-J**) immunoblots of denuded mesenteric arteries ( $\geq 7$  mice per group) showing reduced MLC protein phosphorylation levels in WT MI mice treated with ML-7 quantified in **J**. Individual values are shown with means  $\pm$  s.e.m.; A.U.: arbitrary units. \* $p < 0.05$ , WT control compared to post-MI mice. ANOVA repeated measures and two-tailed Student's  $t$  test

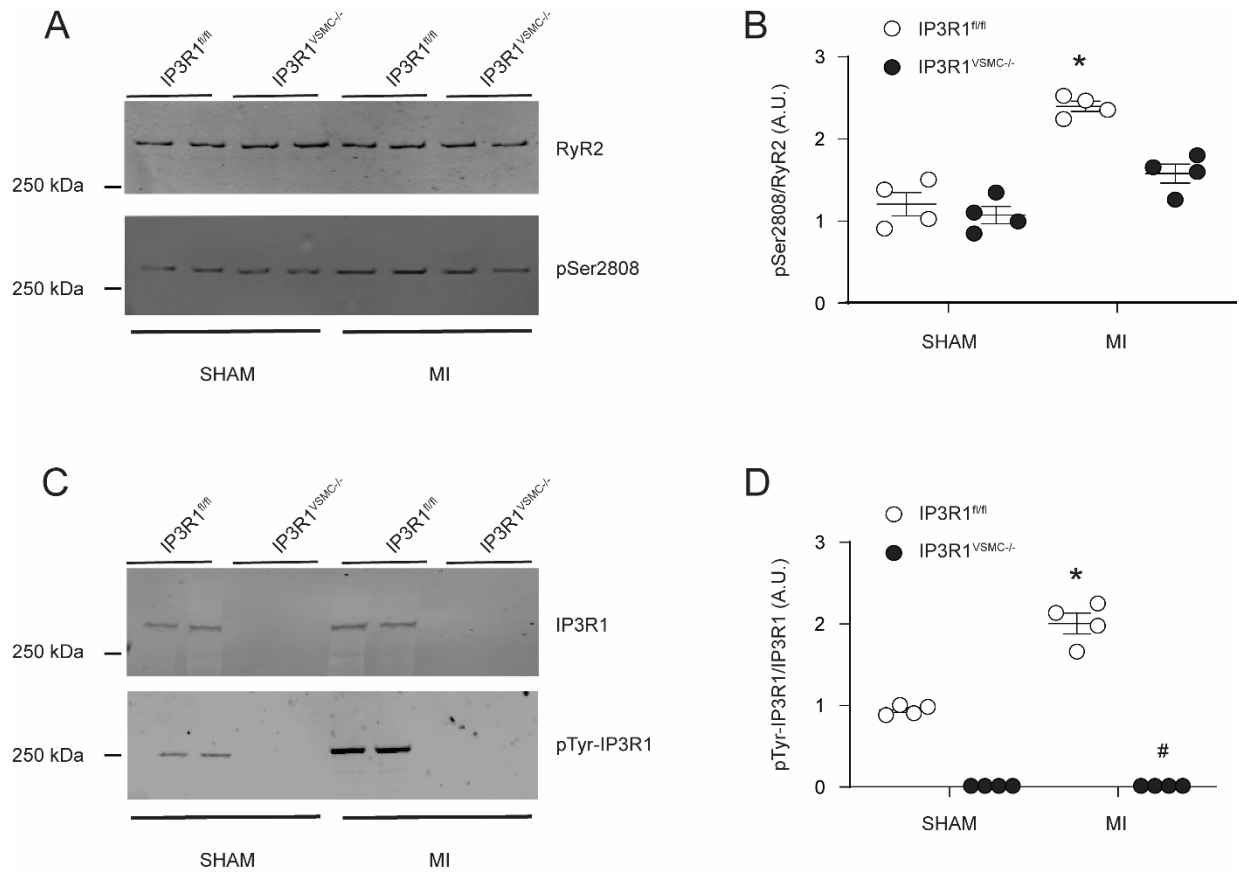

**Figure S8. RyR2 and IP3R1 phosphorylation by PKA and tyrosine kinases in VSMC. A-B)** phosphorylation of RyR2 by PKA on Serine<sup>2808</sup> in denuded mesenteric arteries from IP3R1<sup>fl/fl</sup> and IP3R1<sup>VSMC-/-</sup> SHAM and MI. **C-D)** Phosphorylation of IP3R1 by tyrosine kinases in denuded mesenteric arteries from IP3R1<sup>fl/fl</sup> and IP3R1<sup>VSMC-/-</sup> SHAM and MI. Individual values are shown with mean± s.e.m.; A.U.: arbitrary units. \* $p < 0.05$  vs IP3R1<sup>fl/fl</sup> SHAM, # $p < 0.05$  vs. IP3R1<sup>fl/fl</sup> MI. two-tailed Student's *t* test.



|                       | <b>Age (year)</b> | <b>Sex</b> | <b>Lane number in Figure 1</b> | <b>LVEF (%)</b> | <b>Neurological disorders</b> |
|-----------------------|-------------------|------------|--------------------------------|-----------------|-------------------------------|
| <b>1641 (control)</b> | 68                | Male       | <b>1</b>                       | 45              | None                          |
| <b>1627 (control)</b> | 66                | Male       | <b>2</b>                       | 55              | None                          |
| <b>1576 (control)</b> | 32                | Male       | <b>3</b>                       | 58              | None                          |
| <b>H54 (Control)</b>  | 58                | Male       | <b>4</b>                       | 60              | None                          |
| <b>Z46 (HF)</b>       | 67                | Male       | <b>5</b>                       | 30-45           | None                          |
| <b>H40 (HF)</b>       | 64                | Male       | <b>6</b>                       | 30              | None                          |
| <b>Z39(HF)</b>        | 32                | Male       | <b>7</b>                       | 20-25           | None                          |
| <b>Z111 (HF)</b>      | 66                | Male       | <b>8</b>                       | 20              | None                          |
| <b>1080 (HF)</b>      | 47                | Female     | <b>9</b>                       | 10-15           | None                          |

**Table S1:** Characteristics of HF patients and controls biopsies. Z46, Z39, and 1080 had multiple values from different echocardiographic examinations; therefore, we are showing the min-max range of their left ventricular ejection fraction (LVEF). The lane number corresponds to the position of the sample in the gels in Figure 1.

| Parameter             | SHAM                   |                                     | MI                     |                                     |
|-----------------------|------------------------|-------------------------------------|------------------------|-------------------------------------|
|                       | IP3R1 <sup>fl/fl</sup> | IP3R1 <sup>VSMC<sup>-/-</sup></sup> | IP3R1 <sup>fl/fl</sup> | IP3R1 <sup>VSMC<sup>-/-</sup></sup> |
| BW, g                 | 25.2±1.3               | 24.8±1.5                            | 25.1±1.5               | 25.1±1.6                            |
| HR, bpm               | 504±64                 | 512±68                              | 492±72                 | 496±84                              |
| HW/BW, mg/g           | 4.81±0.71              | 5.01±0.85                           | 8.03±0.83 <sup>#</sup> | 7.7±0.8 <sup>*,#</sup>              |
| LW/BW, mg/g           | 5.5±0.65               | 5.64±0.84                           | 7.25±0.75 <sup>#</sup> | 6.85±0.7 <sup>*,#</sup>             |
| LVEF, %               | 79.6±3.6               | 78.9±4.3                            | 36.8±3.4 <sup>#</sup>  | 46.9±3.1 <sup>*,#</sup>             |
| LVFS, %               | 49.8±1.6               | 49.5±1.7                            | 18.9±1.7 <sup>#</sup>  | 23.4±1.6 <sup>*,#</sup>             |
| dP/dt <sub>max</sub>  | 7720±582               | 7742±594                            | 5864±448 <sup>#</sup>  | 6712±422 <sup>*,#</sup>             |
| LVSBP, mmHg           | 110.8±2.8              | 111.3±3.5                           | 107.1±3.8              | 106.7±3.2                           |
| Serum Tnl, ng/ml      | -                      | -                                   | 61.2±13.3              | 62.4±13.8                           |
| Infarct size, % of LV | -                      | -                                   | 42.1±5.2               | 42.8±5.6                            |

**Table S2. Characteristics of SHAM and MI mice.**

BW: body weight; dP/dt<sub>max</sub>: maximum derivative of change in pressure rise over time; HW: heart weight; HR: heart rate; LV: left ventricle; LVEF: left ventricle ejection fraction; LVFS: left ventricle fractional shortening; LVSBP: left ventricle systolic blood pressure; LW: lung weight; Tnl: Troponin I; n>8 mice/group; \*: p<0.05 vs IP3R1<sup>fl/fl</sup>, #: p<0.05 vs SHAM, ANOVA, Tukey-Kramer *post hoc* test.

|                       | <b>MI</b> | <b>MI+ML-7</b> |
|-----------------------|-----------|----------------|
| BW, g                 | 30.4±1.9  | 30.9±1.1       |
| HR, bpm               | 566±34    | 562±33         |
| LVSBP, mmHg           | 106±15    | 110±15         |
| LVDBP, mmHg           | 81±12     | 79±14          |
| HW/BW, mg/g           | 7.1±1.9   | 5.8±0.6*       |
| LW/BW, mg/g           | 4.4±0.3   | 4.5±0.2        |
| LVEF, %               | 26±5.8    | 48±3.15*       |
| LVFS, %               | 12±3.2    | 24±1.9*        |
| $dP/dt_{max}$         | 6213±235  | 7130±346*      |
| Infarct size, % of LV | 43.4±6.0  | 44.3±4.9       |

**Table S3. Characteristics of MI and MI+ML-7 mice.**

BW: body weight;  $dP/dt_{max}$ : maximum derivative of change in pressure rise over time; HW: heart weight; HR: heart rate; LV: left ventricle; LVEF: left ventricle ejection fraction; LVFS: left ventricle fractional shortening; LVSBP: left ventricle systolic blood pressure; LW: lung weight; Tnl: Troponin I; n = >7 mice/group; \*: p<0.05 vs HF untreated.

| Gene           | Forward 5'-3'                | Reverse 5'-3'                |
|----------------|------------------------------|------------------------------|
| IP3R1          | TGGTCCAGCACTTTGTTTAC         | TCTGCCTTGACAATCGTCTG         |
| IP3R2          | AGACTCTCAGCTCGCTCTGG         | GGCCACGACATCCTGTAAC          |
| IP3R3          | ACATCCTGGCTGAAGACACC         | AAAGGTCTCCACCTCCGTCT         |
| Calponin       | GCACATTTTAACCGAGGTCC         | ATGGACACAAGTGCTAAGCAGTCT     |
| CTGF           | AAGCTGACCTGGAGGAAAACA        | TGCAGCCAGAAAGCTCAAAC         |
| Col1a1         | TTCAGGGAATGCCTGGTGAA         | ACCTTTGGGACCAGCATCA          |
| Col1a2         | GAAAAGGGTCCCTCTGGAGAA        | AATACCGGGAGCACCAAGAA         |
| Col3a1         | TGCTGGAAAGAATGGGGAGAC        | GGTCCAGAATCTCCCTTGTCAC       |
| Col8a1         | CCAGCCCCAGTGGTATTACA         | ACAGTATTCCCAGCAGCTGTA        |
| Osteopontin    | CAGGACAACAACGGAAAGGG         | CCTGGCTCTCTTTGGAATGC         |
| TGF- $\beta$ 1 | GCTGCGCTTGCAGAGATTAA         | GTAACGCCAGGAATTGTTGCTA       |
| SM-MHC         | TGGACACCATGTCAGGGAAA         | AGTCGGCATCGTTTATGGTC         |
| Vimentin       | AGGAAATGGCTCGTCACCTTCGTGAATA | GGAGTGTCCGTTGTTAAGAACTAGAGCT |
| Actin          | CTCTTCCAGCCTTCCTTCT          | AGCACTGTGTTGGCGTACAG         |

**Table S4. Primer sequences.** Col: collagen isoforms; CTGF: connective tissue growth factor; SM-MHC: smooth muscle myosin heavy chain; TGF- $\beta$ 1: transforming growth factor  $\beta$ 1.
